# Supplementary material for: Hepatitis B vaccine effectiveness among vaccinated children in Africa: a systematic review and meta-analysis
Source: BMC Pediatr. 2024 Feb 28;24:145. doi: 10.1186/s12887-024-04557-w (PMC10900737; doi:10.1186/s12887-024-04557-w)
Supplement: Supplementary file 2 — Supplementary Material 2: NEWCASTLE – OTTAWA QUALITY ASSESSMENT SCALE [file 12887_2024_4557_MOESM2_ESM.xlsx]

## Sheet: Mekuanint Geta
NEWCASTLE - OTTAWA QUALITY ASSESSMENT SCALE
Articles	Selection (5 stars)												Comparablity (2 stars)		Outcome (3 stars)							Remark
	1. Representativeness of the sample				2. Sample size		3. Non-respondents			4. Ascertainment of exposure/risk factor			1. confounding factors are controlled		1. Assessment of outcome				2. Statstical test		Total score out of 10
	Truly representative/random sampling*	somewhat represntative/non random*	selected group of user	No description of sampling strategy	Justified and satisfactory*	Not justified/not satisfactory	Response rate is satisfactory*	The response rate is unsatisfactory	No description of response rate	Validated measurment tool*	Non-validated measurment tool	No description of measurment tool	Controls for most important factor*	Control for any additional factors*	Independent blind assessment*	Record linkage	Self report*	No description	Clearly described with CI*	Incomplete
El-Melligy (2013)		*				*	*			*			*		*				*		6	Difference
Salama (2015)	*				*		*			*			*		*				*		7	Difference
Elrashidy (2013)		*				*	*			*			*		*				*		6
Teshome (2019)	*				*		*			*			*		*				*		7
Ayalew (2019)	*				*		*			*			*		*				*		7
Usman (2019)		*				*	*			*			*		*				*		6
Kedir (2019)	*				*		*			*			*		*				*		7
Schoub (2002)	*				*		*			*			*		*				*		7
Abed (2016)	*				*		*			*			*		*				*		7
El-Sayed (2009)		*				*	*			*			*		*				*		6
Argaw (2020)	*				*		*			*			*		*				*		7	Difference

## Sheet: Endalew Yizengaw
NEWCASTLE - OTTAWA QUALITY ASSESSMENT SCALE
Articles	Selection (5 stars)												Comparablity (2 stars)		Outcome (3 stars)							Remark
	1. Representativeness of the sample				2. Sample size		3. Non-respondents			4. Ascertainment of exposure/risk factor			1. confounding factors are controlled		1. Assessment of outcome				2. Statstical test		Total score out of 10
	Truly representative/random sampling*	somewhat represntative/non random*	selected group of user	No description of sampling strategy	Justified and satisfactory*	Not justified/not satisfactory	Response rate is satisfactory*	The response rate is unsatisfactory	No description of response rate	Validated measurment tool*	Non-validated measurment tool	No description of measurment tool	Controls for most important factor*	Control for any additional factors*	Independent blind assessment*	Record linkage	Self report*	No description	Clearly described with CI*	Incomplete
El-Melligy (2013)		*			*		*			*			*		*				*		7	Difference
Salama (2015)	*				*		*			*			*	*	*				*		8	Difference
Elrashidy (2013)		*				*	*			*			*	*	*				*		7
Teshome (2019)	*				*		*			*			*		*				*		7
Ayalew (2019)	*				*		*			*			*		*				*		7
Usman (2019)		*				*	*			*			*		*				*		6
Kedir (2019)	*				*		*			*			*		*				*		7
Schoub (2002)	*				*		*			*			*		*				*		7
Abed (2016)	*				*		*			*			*		*				*		7
El-Sayed (2009)		*				*	*			*			*		*				*		6
Argaw (2020)	*				*		*			*			*	*	*				*		8	Difference

## Sheet: Mutualy agreed evaluation
NEWCASTLE - OTTAWA QUALITY ASSESSMENT SCALE
Articles	Selection (5 stars)												Comparablity (2 stars)		Outcome (3 stars)							Remark
	1. Representativeness of the sample				2. Sample size		3. Non-respondents			4. Ascertainment of exposure/risk factor			1. confounding factors are controlled		1. Assessment of outcome				2. Statstical test		Total score out of 10
	Truly representative/random sampling*	somewhat represntative/non random*	selected group of user	No description of sampling strategy	Justified and satisfactory*	Not justified/not satisfactory	Response rate is satisfactory*	The response rate is unsatisfactory	No description of response rate	Validated measurment tool*	Non-validated measurment tool	No description of measurment tool	Controls for most important factor*	Control for any additional factors*	Independent blind assessment*	Record linkage	Self report*	No description	Clearly described with CI*	Incomplete
El-Melligy (2013)		*			*		*			*			*		*				*		7	Mutual agreement
Salama (2015)	*	*			*		*			*			*		*				*		8	Mutual agreement
Elrashidy (2013)		*				*	*			*			*		*				*		6
Teshome (2019)	*				*		*			*			*		*				*		7
Ayalew (2019)	*				*		*			*			*		*				*		7
Usman (2019)		*				*	*			*			*		*				*		6
Kedir (2019)	*				*		*			*			*		*				*		7
Schoub (2002)	*				*		*			*			*		*				*		7
Abed (2016)	*				*		*			*			*		*				*		7
El-Sayed (2009)		*				*	*			*			*		*				*		6
Argaw (2020)	*				*		*			*			*		*				*		7	Mutual agreement
